# Supplementary material for: Next‐Generation Sequencing Panel Analysis of Clinically Relevant Mutations in Circulating Cell‐Free DNA from Patients with Gestational Trophoblastic Neoplasia: A Pilot Study
Source: Hindawi journal article supplement (doi:10.1155/2020/1314967), 2020-01-01
Supplement: f1 [file 1314967.f1.pdf]

**Supplementary Table 1.** A targeted NGS panel including 559 genes.

---

|          |         |        |        |        |         |         |
|----------|---------|--------|--------|--------|---------|---------|
| ABL1     | CDK6    | FAM46C | ID3    | MSI1   | PPP2R1A | SLX4    |
| ABL2     | CDK8    | FANCA  | IDH1   | MSI2   | PPP2R2A | SMAD2   |
| ABRAXAS1 | CDKN1A  | FANCC  | IDH2   | MST1   | PPP4R2  | SMAD3   |
| ACVR1    | CDKN1B  | FANCD2 | IFNGR1 | MST1R  | PPP6C   | SMAD4   |
| ACVR1B   | CDKN2A  | FANCE  | IGF1   | MTAP   | PRDM1   | SMARCA4 |
| ADGRA2   | CDKN2B  | FANCF  | IGF1R  | MTOR   | PRDM14  | SMARCB1 |
| AGO2     | CDKN2C  | FANCG  | IGF2   | MUTYH  | PREX2   | SMARCD1 |
| AKT1     | CEBPA   | FANCL  | IKBKE  | MYB    | PRKAR1A | SMO     |
| AKT2     | CENPA   | FAS    | IKZF1  | MYC    | PRKCI   | SMYD3   |
| AKT3     | CHD2    | FAT1   | IL10   | MYCL   | PRKD1   | SNCAIP  |
| ALK      | CHD4    | FBXW7  | IL7R   | MYCN   | PRKDC   | SOCS1   |
| ALOX12B  | CHEK1   | FGF10  | INHA   | MYD88  | PRKN    | SOS1    |
| AMER1    | CHEK2   | FGF12  | INHBA  | MYOD1  | PRSS8   | SOX10   |
| ANKRD11  | CIC     | FGF14  | INPP4A | NBN    | PTCH1   | SOX17   |
| APC      | CREBBP  | FGF19  | INPP4B | NCOA3  | PTEN    | SOX2    |
| AR       | CRKL    | FGF23  | INPPL1 | NCOR1  | PTP4A1  | SOX9    |
| ARAF     | CRLF2   | FGF3   | INSR   | NEGR1  | PTPN11  | SPEN    |
| ARFRP1   | CSDE1   | FGF4   | IRF2   | NF1    | PTPRD   | SPOP    |
| ARID1A   | CSF1R   | FGF6   | IRF4   | NF2    | PTPRO   | SPRED1  |
| ARID1B   | CSF3R   | FGFR1  | IRS1   | NFE2L2 | PTPRS   | SPTA1   |
| ARID2    | CTCF    | FGFR2  | IRS2   | NFKBIA | PTPRT   | SRC     |
| ARID5B   | CTLA4   | FGFR3  | JAK1   | NKX2-1 | QKI     | SRSF2   |
| ASXL1    | CTNNA1  | FGFR4  | JAK2   | NKX3-1 | RAB35   | STAG2   |
| ASXL2    | CTNNB1  | FH     | JAK3   | NOTCH1 | RAC1    | STAT3   |
| ATM      | CUL3    | FLCN   | JUN    | NOTCH2 | RAC2    | STAT4   |
| ATR      | CUL4A   | FLT1   | KAT6A  | NOTCH3 | RAD21   | STAT5A  |
| ATRX     | CXCR4   | FLT3   | KDM5A  | NOTCH4 | RAD50   | STAT5B  |
| AURKA    | CYLD    | FLT4   | KDM5C  | NPM1   | RAD51   | STK11   |
| AURKB    | CYP17A1 | FOXA1  | KDM6A  | NRAS   | RAD51B  | STK19   |

---

---

|         |         |           |         |          |         |          |
|---------|---------|-----------|---------|----------|---------|----------|
| AXIN1   | CYSLTR2 | FOXL2     | KDR     | NSD1     | RAD51C  | STK40    |
| AXIN2   | DAXX    | FOXO1     | KEAP1   | NSD2     | RAD51D  | SUFU     |
| AXL     | DCUN1D1 | FOXP1     | KEL     | NSD3     | RAD52   | SUZ12    |
| B2M     | DDR1    | FRS2      | KIT     | NT5C2    | RAD54L  | SYK      |
| BABAM1  | DDR2    | FUBP1     | KLF4    | NTHL1    | RAF1    | TAF1     |
| BAP1    | DICER1  | FYN       | KLHL6   | NTRK1    | RANBP2  | TAP1     |
| BARD1   | DIS3    | GABRA6    | KMT2A   | NTRK2    | RARA    | TAP2     |
| BBC3    | DNAJB1  | GATA1     | KMT2B   | NTRK3    | RASA1   | TBX3     |
| BCL10   | DNMT1   | GATA2     | KMT2C   | NUF2     | RB1     | TCF3     |
| BCL2    | DNMT3A  | GATA3     | KMT2D   | NUP93    | RBM10   | TCF7L2   |
| BCL2L1  | DNMT3B  | GATA4     | KMT5A   | NUTM1    | RECQL   | TEK      |
| BCL2L11 | DOT1L   | GATA6     | KNSTRN  | P2RY8    | RECQL4  | TERC     |
| BCL2L2  | DROSHA  | GID4      | KRAS    | PAK1     | REL     | TERT     |
| BCL6    | DUSP4   | GLI1      | LATS1   | PAK3     | RET     | TET1     |
| BCOR    | E2F3    | GNA11     | LATS2   | PAK5     | RFWD2   | TET2     |
| BCORL1  | EED     | GNA13     | LMO1    | PALB2    | RHEB    | TGFBR1   |
| BCR     | EGFL7   | GNAQ      | LRP1B   | PARP1    | RHOA    | TGFBR2   |
| BIRC3   | EGFR    | GNAS      | LTK     | PARP2    | RICTOR  | TIPARP   |
| BLM     | EIF1AX  | GPS2      | LYN     | PARP3    | RIT1    | TMEM127  |
| BMPR1A  | EIF4A2  | GREM1     | LZTR1   | PAX5     | RNF43   | TMPRSS2  |
| BRAF    | EIF4E   | GRIN2A    | MAF     | PAX8     | ROS1    | TNFAIP3  |
| BRCA1   | ELF3    | GRM3      | MAGI2   | PBRM1    | RPS6KA4 | TNFRSF14 |
| BRCA2   | ELOC    | GSK3B     | MALT1   | PDCD1    | RPS6KB2 | TOP1     |
| BRD4    | EMSY    | H3F3A     | MAP2K1  | PDCD1LG2 | RPTOR   | TOP2A    |
| BRIP1   | EP300   | H3F3B     | MAP2K2  | PDGFRA   | RRAGC   | TP53     |
| BTG1    | EPAS1   | H3F3C     | MAP2K4  | PDGFRB   | RRAS    | TP53BP1  |
| BTG2    | EPCAM   | HDAC1     | MAP3K1  | PDK1     | RRAS2   | TP63     |
| BTK     | EPHA3   | HGF       | MAP3K13 | PDPK1    | RSPO2   | TRAF2    |
| CALR    | EPHA5   | HIST1H1C  | MAP3K14 | PGR      | RTEL1   | TRAF7    |
| CARD11  | EPHA7   | HIST1H2BD | MAPK1   | PHOX2B   | RUNX1   | TSC1     |

---

---

|       |        |          |         |         |         |        |
|-------|--------|----------|---------|---------|---------|--------|
| CARM1 | EPHB1  | HIST1H3A | MAPK3   | PIK3C2B | RUNX1T1 | TSC2   |
| CASP8 | EPHB4  | HIST1H3B | MAPKAP1 | PIK3C2G | RXRA    | TSHR   |
| CBFB  | ERBB2  | HIST1H3C | MAX     | PIK3C3  | RYBP    | TYRO3  |
| CBL   | ERBB3  | HIST1H3D | MCL1    | PIK3CA  | SDC4    | U2AF1  |
| CCND1 | ERBB4  | HIST1H3E | MDC1    | PIK3CB  | SDHA    | UPF1   |
| CCND2 | ERCC2  | HIST1H3F | MDM2    | PIK3CD  | SDHAF2  | VEGFA  |
| CCND3 | ERCC3  | HIST1H3G | MDM4    | PIK3CG  | SDHB    | VHL    |
| CCNE1 | ERCC4  | HIST1H3H | MED12   | PIK3R1  | SDHC    | VTCN1  |
| CCNQ  | ERCC5  | HIST1H3I | MEF2B   | PIK3R2  | SDHD    | WISP3  |
| CD22  | ERF    | HIST1H3J | MEN1    | PIK3R3  | SESN1   | WT1    |
| CD274 | ERG    | HIST2H3C | MERTK   | PIM1    | SESN2   | WWTR1  |
| CD276 | ERRFI1 | HIST2H3D | MET     | PLCG2   | SESN3   | XIAP   |
| CD70  | ESR1   | HIST3H3  | MGA     | PLK2    | SETD2   | XPO1   |
| CD74  | ETV1   | HLA-A    | MITF    | PMAIP1  | SF3B1   | XRCC2  |
| CD79A | ETV4   | HLA-B    | MKNK1   | PMS1    | SGK1    | YAP1   |
| CD79B | ETV5   | HNF1A    | MLH1    | PMS2    | SH2B3   | YES1   |
| CDC42 | ETV6   | HOXB13   | MPL     | PNRC1   | SH2D1A  | ZBTB2  |
| CDC73 | EWSR1  | HRAS     | MRE11   | POLD1   | SHOC2   | ZFHX3  |
| CDH1  | EZH1   | HSD3B1   | MSH2    | POLE    | SHQ1    | ZNF217 |
| CDK12 | EZH2   | HSP90AA1 | MSH3    | PPARG   | SLC34A2 | ZNF703 |
| CDK4  | EZR    | ICOSLG   | MSH6    | PPM1D   | SLIT2   |        |

---

**Supplementary Table 2.** Normal distribution test for plasma HCG level.

|          | Kolmogorov-Smirnov <sup>a</sup> |    |      | Shapiro-Wilk |    |      |
|----------|---------------------------------|----|------|--------------|----|------|
|          | statistic                       | df | Sig. | statistic    | df | Sig. |
| VAR00001 | .346                            | 11 | .001 | .703         | 11 | .001 |

a. Lilliefors correction to significance level
